# Supplementary material for: Dynamics and quantitative contribution of the aminoglycoside 6′-N-acetyltransferase type Ib [AAC(6′)-Ib] to amikacin resistance
Source: PubMed Central journal article supplement — bioRxiv. 2023 Dec 15:2023.09.05.556435. Preprint. [Version 2] doi: 10.1101/2023.09.05.556435 (PMC10760054; doi:10.1101/2023.09.05.556435), 2023-12-15
Supplement: NIHPP2023.09.05.556435V2-supplement-1.pdf [file NIHPP2023.09.05.556435V2-supplement-1.pdf]

## 492 Supplementary data

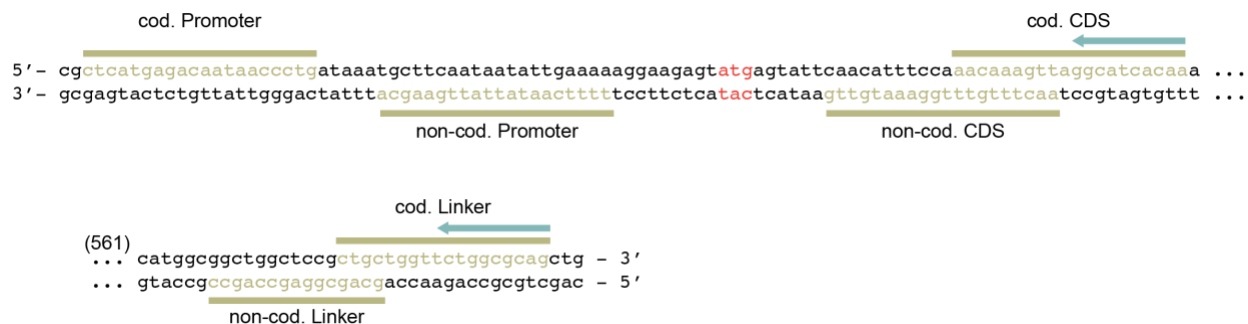

493

494 **Figure S1** – dCas9 targets (Promoter, CDS and Linker on both the coding (cod.) and non-coding (non-cod.) strands)

495 in the *aac(6)-Ib* gene on the pJHCMW1-derivative plasmid. The complementary sequence to the gRNA (green bar) is

496 highlighted in green and the blue arrow represents the positions at which the mismatches in the sequence of the gRNA

497 were introduced. The *aac(6)-Ib* START codon is indicated in red and the number of base pairs not included in this

498 representation are indicated in parenthesis.

499  
500  
501

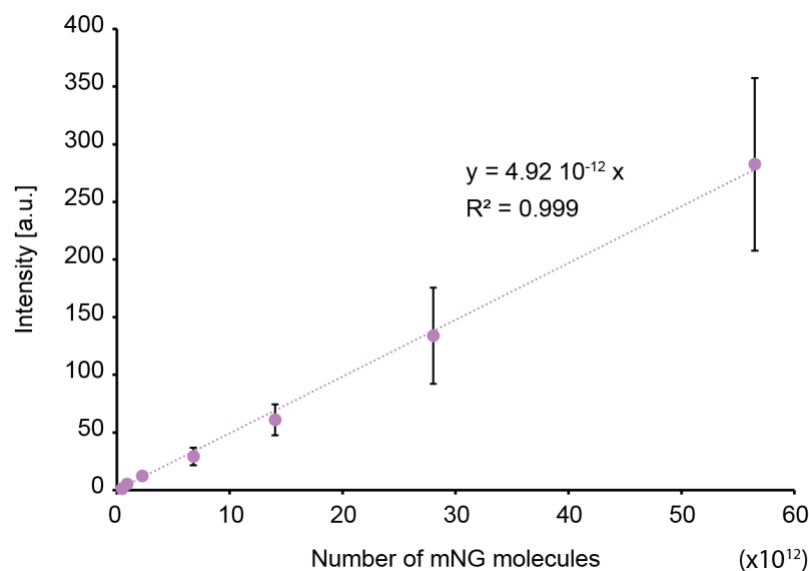

502

503 **Figure S2** – Calibration curve between mNeonGreen intensity measured by spectrofluorometry (in arbitrary units, a.u.)

504 and the number of mNeonGreen molecules. The equation of the linear trendline, as well as the correlation coefficient

505 ( $R^2$ ), are indicated on the plot.

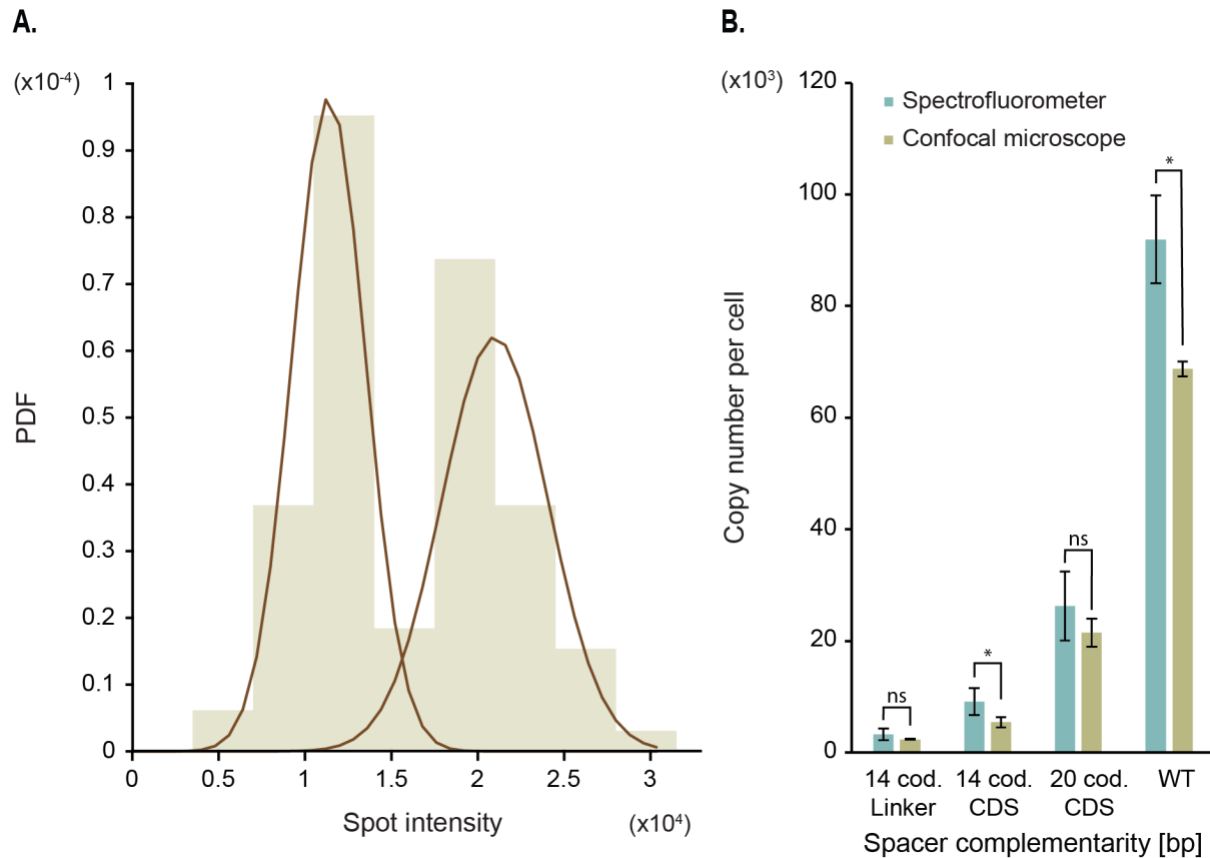

506

507 **Figure S3** – Confirmation of AAC(6')-Ib copy number by confocal microscopy. **A.** mNeonGreen intensity per molecule,  
 508 estimated by imaging Nup59-mNeonGreen. The brown lines represent the Gaussian Mixture Model fitted to each  
 509 population. The one on the left represents the 16-mer Nup59 (mean intensity = 11374.4), and the second peak carries  
 510 32 Nup59 (mean intensity = 20988.6). This gives an average intensity of 710.9 per mNeonGreen molecule. In total, 93  
 511 spots are represented in this plot. **B.** AAC(6')-Ib copy number estimated with the spectrofluorometer (blue bars) and  
 512 with the confocal microscope (green bars) for four strains, each carrying a different guide RNA. The length of the gRNA  
 513 that is complementary to the coding (cod.) strand, as well as the targeted region of the *aac(6')-Ib* gene,  
 514 Error bars represent the standard deviation and comparative statistical analysis was performed to compare the two  
 515 methods (ns, not significant, and \*, significant for  $p=0.05$ ).

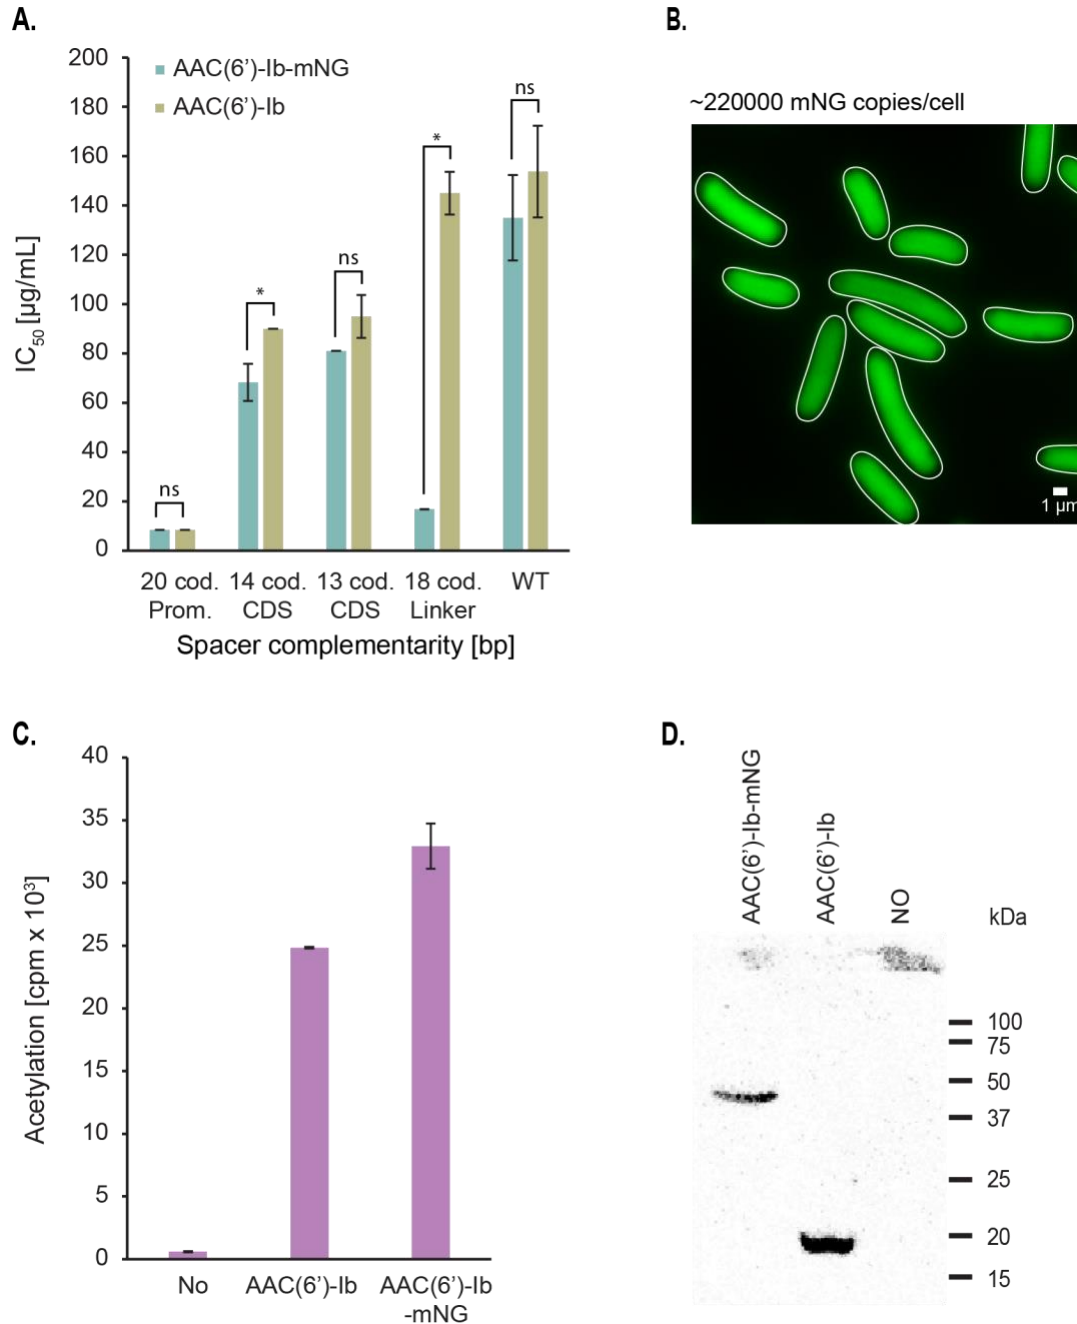

516

517 **Figure S4** – The mNeonGreen (mNG) fluorescent tag does not alter AAC(6')-Ib activity and does not force protein  
 518 aggregation. **A.** Inhibitory concentration at which 50% of growth is inhibited by the amikacin antibiotic (IC<sub>50</sub>) for different  
 519 repression levels of AAC(6')-Ib copy number per cell. The length of the gRNA that is complementary to the coding (cod.)  
 520 strand, as well as the targeted region of the *aac(6')-Ib* gene, are indicated (Prom, promoter; CDS, coding sequence;  
 521 WT, wild-type). Error bars represent the standard deviation and comparative statistical analysis was performed to  
 522 compare the effect of the mNG tag on the activity of the enzyme in the cell (ns, not significant, and \*, significant for

523 p=0.05). **B.** Representative image of AB1157 cells expressing high concentrations of mNG molecules from a pUC18  
524 derivative plasmid. Copy number quantified by spectrofluorometry ( $221483.5 \pm 16440.8$  mNG copies/cell). **C.** Effect of  
525 mNG on AAC(6')-Ib-catalyzed acetylation of amikacin. **D.** Western blot showing total concentration of enzyme, in the  
526 wild-type background.

527 Table S1 - Strains used for this study.

| Strain    | Relevant genotype                                                                                                                                                                                                                                                                                                                                                                 | Source    |
|-----------|-----------------------------------------------------------------------------------------------------------------------------------------------------------------------------------------------------------------------------------------------------------------------------------------------------------------------------------------------------------------------------------|-----------|
| AB1157    | <i>thr-1</i> , <i>araC14</i> , <i>leuB6</i> (Am), DE( <i>gpt-proA</i> )62, <i>lacY1</i> , <i>tsx33</i> , <i>qsr</i> '-0, <i>glnV44</i> (AS), <i>galk2</i> (Oc), LAM <sup>-</sup> , Rac-0, <i>hisG4</i> (Oc), <i>rfbC1</i> , <i>mgl-51</i> , <i>rpoS396</i> (Am), <i>rpsL31</i> (str <sup>R</sup> ), <i>kdgK51</i> , <i>xylA5</i> , <i>mtl-1</i> , <i>argE3</i> (Oc), <i>thi-1</i> | (49)      |
| BL21(DE3) | <i>fhuA2</i> [lon] <i>ompT gal</i> [dcm] $\Delta$ <i>hdsS</i>                                                                                                                                                                                                                                                                                                                     | (50)      |
| TB25      | AB1157 derivative, <i>P<sub>lacq-lacI</sub> P<sub>Lac-s-dCas9</sub> cat::<math>\Delta</math>attB</i>                                                                                                                                                                                                                                                                              | This work |
| FHcas1nc  | TB25 derivative, <i>gRNA-Prom (20bp cod.)::argE</i>                                                                                                                                                                                                                                                                                                                               | This work |
| FHcas1    | TB25 derivative, <i>gRNA-Prom (20bp non-cod.)::argE</i>                                                                                                                                                                                                                                                                                                                           | This work |
| FHcas2nc  | TB25 derivative, <i>gRNA-CDS (20bp cod.)::argE</i>                                                                                                                                                                                                                                                                                                                                | This work |
| LW3       | TB25 derivative, <i>gRNA-CDS (15bp cod.)::argE</i>                                                                                                                                                                                                                                                                                                                                | This work |
| TY1       | TB25 derivative, <i>gRNA-CDS (14bp cod.)::argE</i>                                                                                                                                                                                                                                                                                                                                | This work |
| LW2       | TB25 derivative, <i>gRNA-CDS (13bp cod.)::argE</i>                                                                                                                                                                                                                                                                                                                                | This work |
| LW1       | TB25 derivative, <i>gRNA-CDS (12bp cod.)::argE</i>                                                                                                                                                                                                                                                                                                                                | This work |

|          |                                                                    |           |
|----------|--------------------------------------------------------------------|-----------|
| TY2      | TB25 derivative, <i>gRNA-CDS (11bp cod.)::argE</i>                 | This work |
| TY3      | TB25 derivative, <i>gRNA-CDS (10bp cod.)::argE</i>                 | This work |
| FHcas2   | TB25 derivative, <i>gRNA-CDS (20bp non-cod.)::argE</i>             | This work |
| FHcas3nc | TB25 derivative, <i>gRNA-Linker (18bp cod.)::argE</i>              | This work |
| TY4      | TB25 derivative, <i>gRNA-Linker (14bp cod.)::argE</i>              | This work |
| TY5      | TB25 derivative, <i>gRNA-Linker (11bp cod.)::argE</i>              | This work |
| TY6      | TB25 derivative, <i>gRNA-Linker (10bp cod.)::argE</i>              | This work |
| LW4      | TB25 derivative, <i>gRNA-Linker (9bp cod.)::argE</i>               | This work |
| FHcas3   | TB25 derivative, <i>gRNA-Linker (15bp non-cod.)::argE</i>          | This work |
| OD030    | <i>P<sub>Lac</sub>-mMaple kan::Δgalk</i>                           | This work |
| YHZ23    | <i>MATa his3Δ1 leu2Δ0 met15Δ0 LYS2 ura3Δ0 nup59-mNeonGreen-Nat</i> | This work |

528

529

530 Table S2 – Plasmids used in this study.

| Plasmid     | Description                                                                                                                                                     | Source    |
|-------------|-----------------------------------------------------------------------------------------------------------------------------------------------------------------|-----------|
| pTT4        | pJHCMW1 derivative containing 96 copies of <i>tetO</i> inserted into the <i>tnpA</i> gene.                                                                      | (17)      |
| pTT4-mNG-wL | pTT4 derivative carrying an <i>aac(6')-Ib-mNeonGreen</i> fusion.                                                                                                | This work |
| pFH3        | pTT4 derivative carrying an <i>aac(6')-Ib-mMaple</i> fusion.                                                                                                    | This work |
| pROD93      | Plasmid containing the <i>mMaple</i> gene under a P <sub>Lac</sub> promoter, with an R6K gamma origin and kanamycin resistance.                                 | (36)      |
| pTB35       | Plasmid carrying the <i>dCas9</i> gene under P <sub>Lac</sub> promoter with constitutive lac. Used for <i>attP</i> integration with chloramphenicol resistance. | (51)      |
| pTB40-1     | Plasmid expressing dnaX-targetting gRNA. R6K gamma <i>ori</i> .                                                                                                 | This work |
| pVV03       | pUC18 derivative expressing mNeonGreen from a lac promoter and Kanamycin resistance                                                                             | This work |

532 **Table S3** – Primers used in this work. The guide RNA sequences are highlighted in green, while the mutated base pairs  
 533 are shown in blue. cod., coding, non-cod., non-coding, compl., complementary, CDS, coding sequence.

| Primer       | Sequence 5'-3'                                              | Description                                                                                     |
|--------------|-------------------------------------------------------------|-------------------------------------------------------------------------------------------------|
| TB04         | ACTAGTAUTATACCTAGGACTGA<br>G                                | Fixed primer for gRNA mutagenesis on the pTB40-1 plasmid                                        |
| FHcas1       | ATACTAGUTGCTTCAATAATATTG<br>AAAAGTTTTAGAGCTAGAAATAG<br>CAAG | Primer for gRNA mutagenesis of the pTB40-1 plasmid. 20bp compl. to non-cod. strand of promoter. |
| FHcas1nc     | ATACTAGUCAGGGTTATTGTCTC<br>ATGAGGTTTTAGAGCTAGAAATA<br>GCAAG | Primer for gRNA mutagenesis of the pTB40-1 plasmid. 20bp compl. to cod. strand of promoter.     |
| FHcas2       | ATACTAGUCAACATTTCCAAACA<br>AAGTTGTTTTAGAGCTAGAAATA<br>GCAAG | Primer for gRNA mutagenesis of the pTB40-1 plasmid. 20bp compl. to non-cod. strand of CDS.      |
| FHcas2nc     | ATACTAGUTTGATGCTAACT<br>TTGTTGTTTTAGAGCTAGAAATA<br>GCAAG    | Primer for gRNA mutagenesis of the pTB40-1 plasmid. 20bp compl. to cod. strand of CDS.          |
| FHcas3       | ATACTAGUGCCATGGCTGGCTC<br>CGCTGCGTTTTAGAGCTAGAAAT<br>AGCAAG | Primer for gRNA mutagenesis of the pTB40-1 plasmid. 15bp compl. to non-cod. strand of linker.   |
| FHcas3nc     | ATACTAGUGACTGCGCCAGAAC<br>CAGCAGGTTTTAGAGCTAGAAAT<br>AGCAAG | Primer for gRNA mutagenesis of the pTB40-1 plasmid. 18bp compl. to cod. strand of linker.       |
| 14bpFHcas2nc | ATACTAGUAACACTTGCCTAACT<br>TTGTTGTTTTAGAGCTAGAAATA<br>GCAAG | Primer for gRNA mutagenesis of the pTB40-1 plasmid. 14bp compl. to cod. strand of CDS.          |



|              |                                                                                      |                                                                                           |
|--------------|--------------------------------------------------------------------------------------|-------------------------------------------------------------------------------------------|
| 11bpFHcas2nc | ATACTAGUAACTACTACGCTAACT<br>TTGTTGTTTTAGAGCTAGAAATA<br>GCAAG                         | Primer for gRNA mutagenesis of the pTB40-1 plasmid. 11bp compl. to cod. strand of CDS.    |
| 10bpFHcas2nc | ATACTAGUAACTACTACGGTAACT<br>TTGTTGTTTTAGAGCTAGAAATA<br>GCAAG                         | Primer for gRNA mutagenesis of the pTB40-1 plasmid. 10bp compl. to cod. strand of CDS.    |
| 14bpFHcas3nc | ATACTAGUCTGACGGCCAGAAC<br>CAGCAGGTTTTAGAGCTAGAAAT<br>AGCAAG                          | Primer for gRNA mutagenesis of the pTB40-1 plasmid. 14bp compl. to cod. strand of linker. |
| 11bpFHcas3nc | ATACTAGUCTGACGCGGAGAAC<br>CAGCAGGTTTTAGAGCTAGAAAT<br>AGCAAG                          | Primer for gRNA mutagenesis of the pTB40-1 plasmid. 11bp compl. to cod. strand of linker. |
| 10bpFHcas3nc | ATACTAGUCTGACGCGGTGAAC<br>CAGCAGGTTTTAGAGCTAGAAAT<br>AGCAAG                          | Primer for gRNA mutagenesis of the pTB40-1 plasmid. 10bp compl. to cod. strand of linker. |
| 12bpFHcas2nc | ATACTAGUAACTACTACCCTAACT<br>TTGTTGTTTTAGAGCTAGAAATA<br>GCAAG                         | Primer for gRNA mutagenesis of the pTB40-1 plasmid. 12bp compl. to cod. strand of CDS.    |
| 13bpFHcas2nc | ATACTAGUAACTACTAGCCTAACT<br>TTGTTGTTTTAGAGCTAGAAATA<br>GCAAG                         | Primer for gRNA mutagenesis of the pTB40-1 plasmid. 13bp compl. to cod. strand of CDS.    |
| 15bpFHcas2nc | ATACTAGUAACTCATGCCTAACT<br>TTGTTGTTTTAGAGCTAGAAATA<br>GCAAG                          | Primer for gRNA mutagenesis of the pTB40-1 plasmid. 15bp compl. to cod. strand of CDS.    |
| 9bpFHcas3nc  | ATACTAGUCTGACGCGGTCAAC<br>CAGCAGGTTTTAGAGCTAGAAAT<br>AGCAAG                          | Primer for gRNA mutagenesis of the pTB40-1 plasmid. 9bp compl. to cod. strand of linker.  |
| TB200        | ATAAATACTGCATGAATATTGATA<br>CTATCATGACCAGAGGTGTGTC<br>AACATTTTCGCTAAGGATGATTC<br>TGG | Primer to insert each gRNA into <i>argE</i> gene by lambda red.                           |

|                  |                                                                                     |                                                                          |
|------------------|-------------------------------------------------------------------------------------|--------------------------------------------------------------------------|
| TB201            | CGGATGCGGCGCGAGCGCCTT<br>ATCCGGCCTACGTTTTAATGCCA<br>GCATATCCTCCTTAGTTCCTATT<br>CC   | Primer to insert each gRNA into <i>argE</i> gene by lambda red.          |
| mMapleNcoI_<br>F | TTTCCATGGCTGGCTCCGCTGC<br>TGGTTC                                                    | Primer to clone <i>mMaple</i> into pTT4 by <i>NcoI</i> digestion.        |
| mMapleNcoI_<br>R | TTTCCATGGTACTTGTACAGCT<br>CGTCCATGC                                                 | Primer to clone <i>mMaple</i> into pTT4 by <i>NcoI</i> digestion.        |
| galK_insF        | GTTTGCGCGCAGTCAGCGATAT<br>CCATTTTCGCGAATCCGGAGTG<br>TAAGAACGCCCAATACGCAAAC<br>CG    | Primer to insert <i>pLac-mMaple</i> into <i>galK</i> gene by lambda red. |
| galK_insR        | CGGCTGACCATCGGGTGCCAG<br>TGCGGGAGTTTCGTTTCAGCACT<br>GTCCTGCCTTATGAATATCCTCC<br>TTAG | Primer to insert <i>pLac-mMaple</i> into <i>galK</i> gene by lambda red. |

534

535

536 **Table S4** – Number of repeats and total cell count for Figure 3.D

| <b>Strain</b> | <b>Treatment</b> | <b>Number of repeats</b> | <b>Total number of cells</b> | <b>Average copy number <math>\pm</math> Standard deviation</b> |
|---------------|------------------|--------------------------|------------------------------|----------------------------------------------------------------|
| TY4           | /                | 3                        | 2402.99 $\pm$ 852.69         | 1212                                                           |
|               | EDTA             | 3                        | 1681.9 $\pm$ 689.61          | 1492                                                           |
| TY1           | /                | 3                        | 5193.5 $\pm$ 1673.95         | 1673                                                           |
|               | EDTA             | 3                        | 4299.94 $\pm$ 1375.28        | 1365                                                           |
| FHcas2        | /                | 3                        | 21798.56 $\pm$ 6187.83       | 1633                                                           |
|               | EDTA             | 3                        | 16461.43 $\pm$ 4888.06       | 639                                                            |
| TB25          | /                | 3                        | 68815.57 $\pm$ 15122.08      | 1900                                                           |
|               | EDTA             | 3                        | 67141.91 $\pm$ 21968.79      | 873                                                            |

537
